# Supplementary material for: Rice genes involved in phytosiderophore biosynthesis are synchronously regulated during the early stages of iron deficiency in roots
Source: PubMed Central journal article supplement (PMC4883707; doi:10.1186/1939-8433-6-16), 2013-06-25
Supplement: 12284_2012_53_MOESM5_ESM.pdf [file 12284_2012_53_MOESM5_ESM.pdf]

Expression pattern

gene  
number

|   | 3 | 6 | 9 | 12 | 24 | 36 (h) |     |
|---|---|---|---|----|----|--------|-----|
| A | ■ |   |   |    |    |        | 257 |
| B |   |   |   |    | ■  | ■      | 96  |
| C |   |   |   |    |    | ■      | 85  |
| D |   |   |   |    | ■  |        | 63  |
| E | ■ | ■ | ■ | ■  | ■  | ■      | 51  |
| F | ■ | ■ |   |    |    |        | 39  |
| G | ■ | ■ | ■ | ■  | ■  |        | 36  |
| H |   |   |   | ■  |    |        | 32  |
| I |   | ■ |   |    |    |        | 31  |
| J | ■ | ■ | ■ |    |    |        | 25  |

Other 51 patterns

353

Total

1068
