# Supplementary material for: Rice genes involved in phytosiderophore biosynthesis are synchronously regulated during the early stages of iron deficiency in roots
Source: PubMed Central journal article supplement (PMC4883707; doi:10.1186/1939-8433-6-16), 2013-06-25

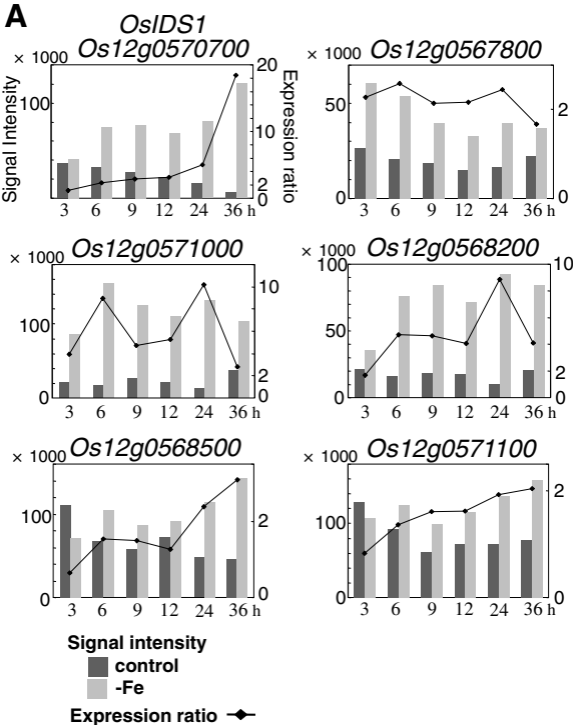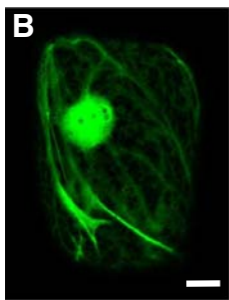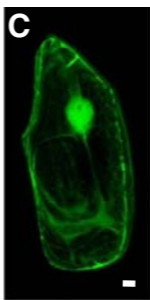

Supplement: 12284_2012_53_MOESM10_ESM.pdf [file 12284_2012_53_MOESM10_ESM.pdf]
